# Supplementary material for: Targeting CSF1 /CSF1R axis alleviates intervertebral disc degeneration and associated neuropathic pain
Source: Research Square preprint supplement (doi:10.21203/rs.3.rs-8507679/v1), 2026-01-22

**Supplementary Materials for**

**Targeting CSF1 /CSF1R axis** **alleviates intervertebral disc degeneration and associated neuropathic pain**

Lei Liu et al

**Corresponding author**

Yi Lu: [ylu4@bwh.harvard.edu](mailto:ylu4@bwh.harvard.edu), Hong Guo: hguo3@bwh.harvard.edu

**The PDF file includes:**

Figs. S1 to S7

**Supplementary Figure 1 Supporting analyses for NPC heterogeneity. (Related to Figure 1)**
(A) UMAP visualization of single cells from mild vs. severe NP tissues.
(B) Heatmap illustrating cellular signaling communication between macrophage and other NP cell subsets based on CellChat analysis of scRNA-Seq data.

(C) Dotplot of gene expression.

(D) UMAP display of NPC marker gene expression.
(E) Violin plots displaying indicated pathway activity scores (MSigDB Hallmark gene sets) in sub-cluster of NPCs.
(F-G) GO enrichment analysis of Fib-Inf-NPCs (F) and Fib-NPCs (G).
(H) Pseudotime kinetics of key genes in NPCs.
(I) *CSF1* expression in human cartilaginous endplate tissues (n=3 each group;  *p=0.004, ANOVA).

**
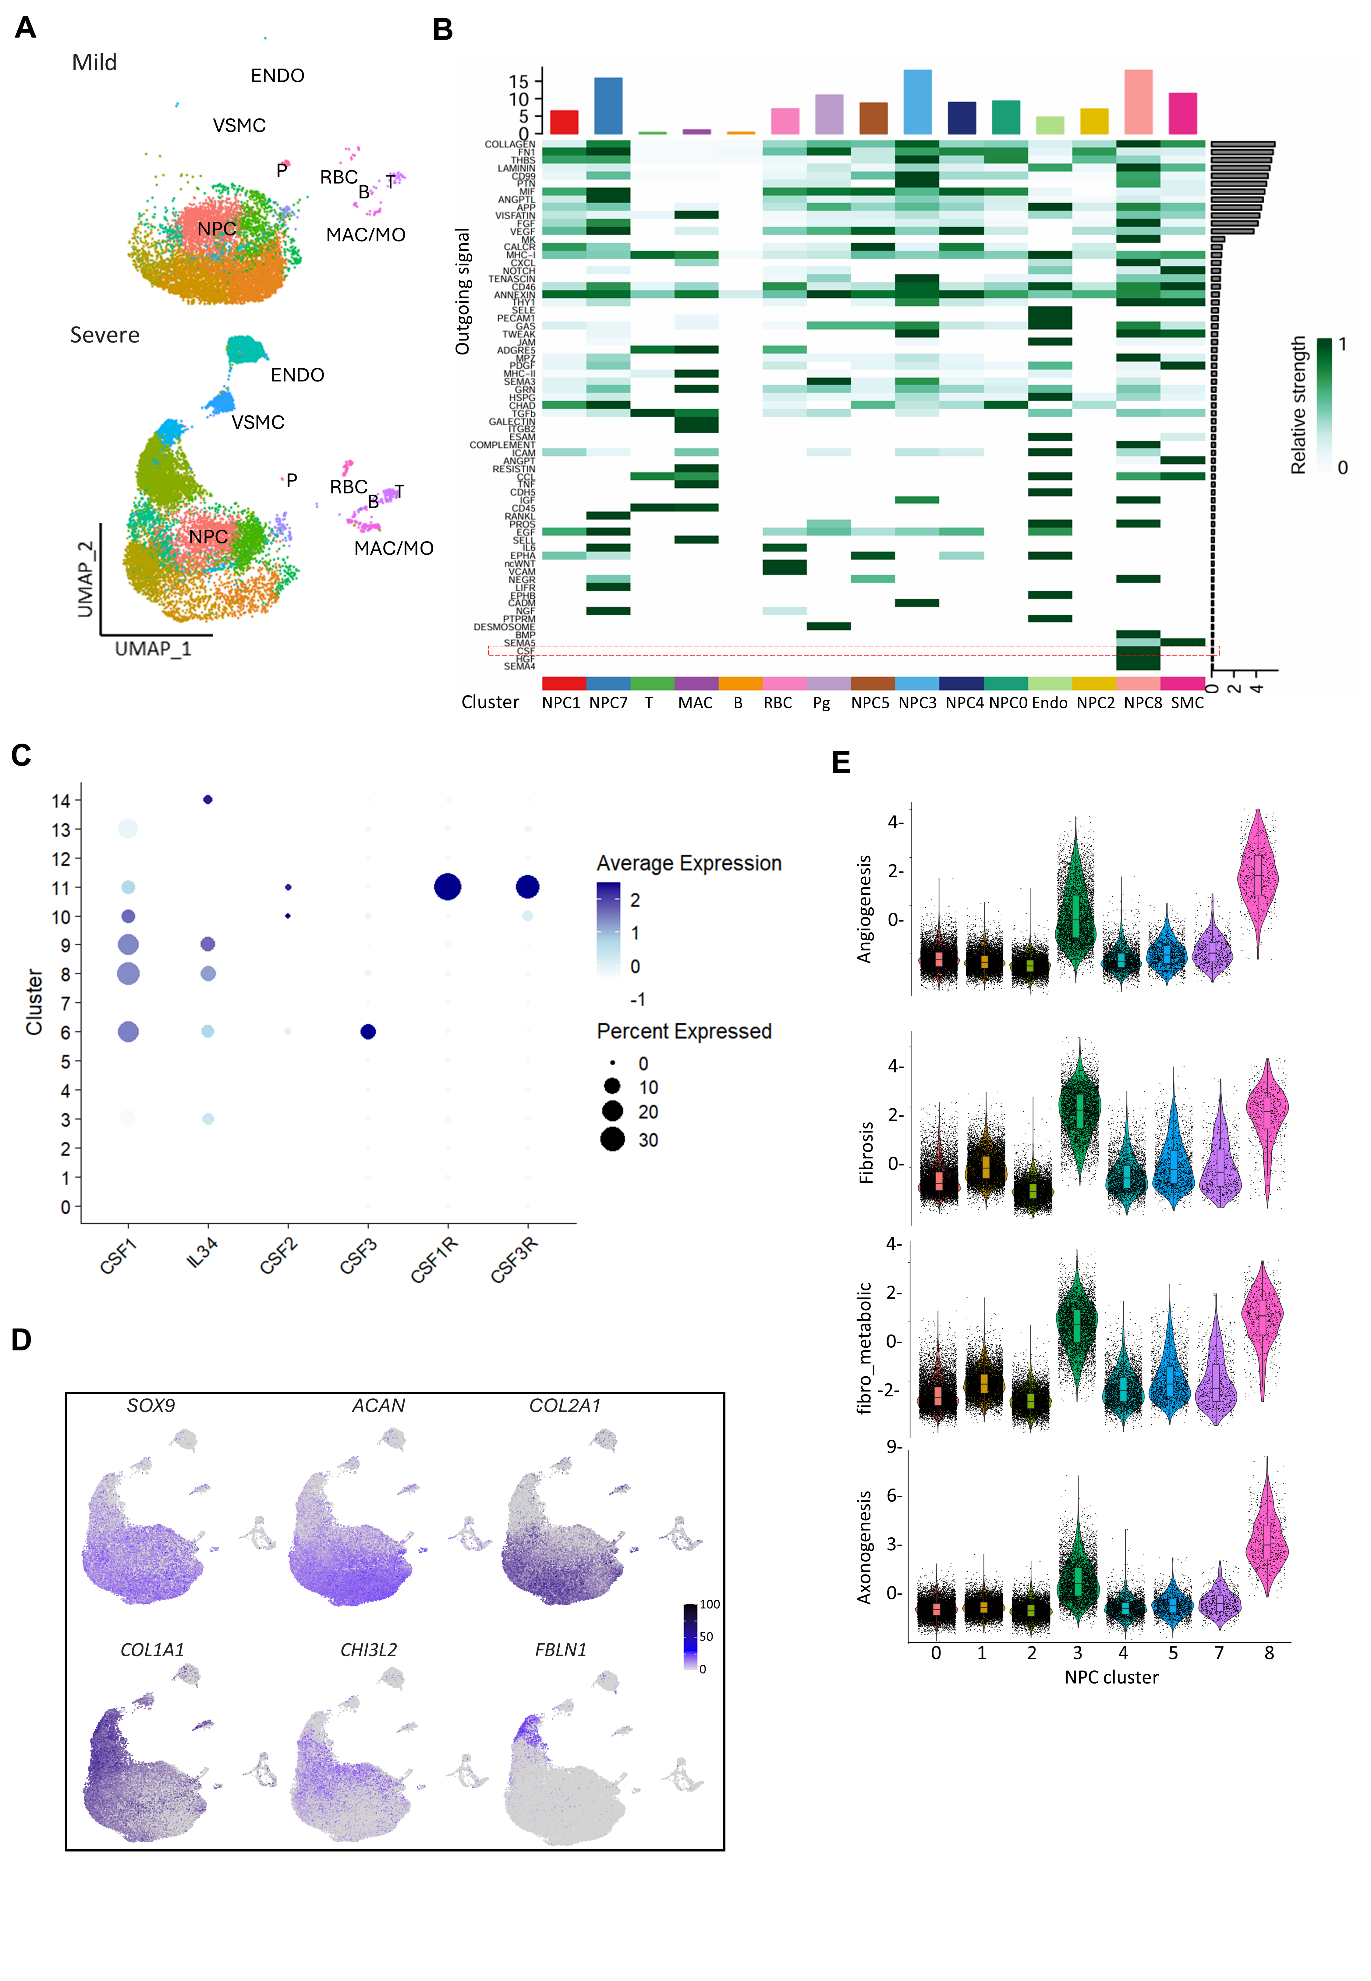
**

**
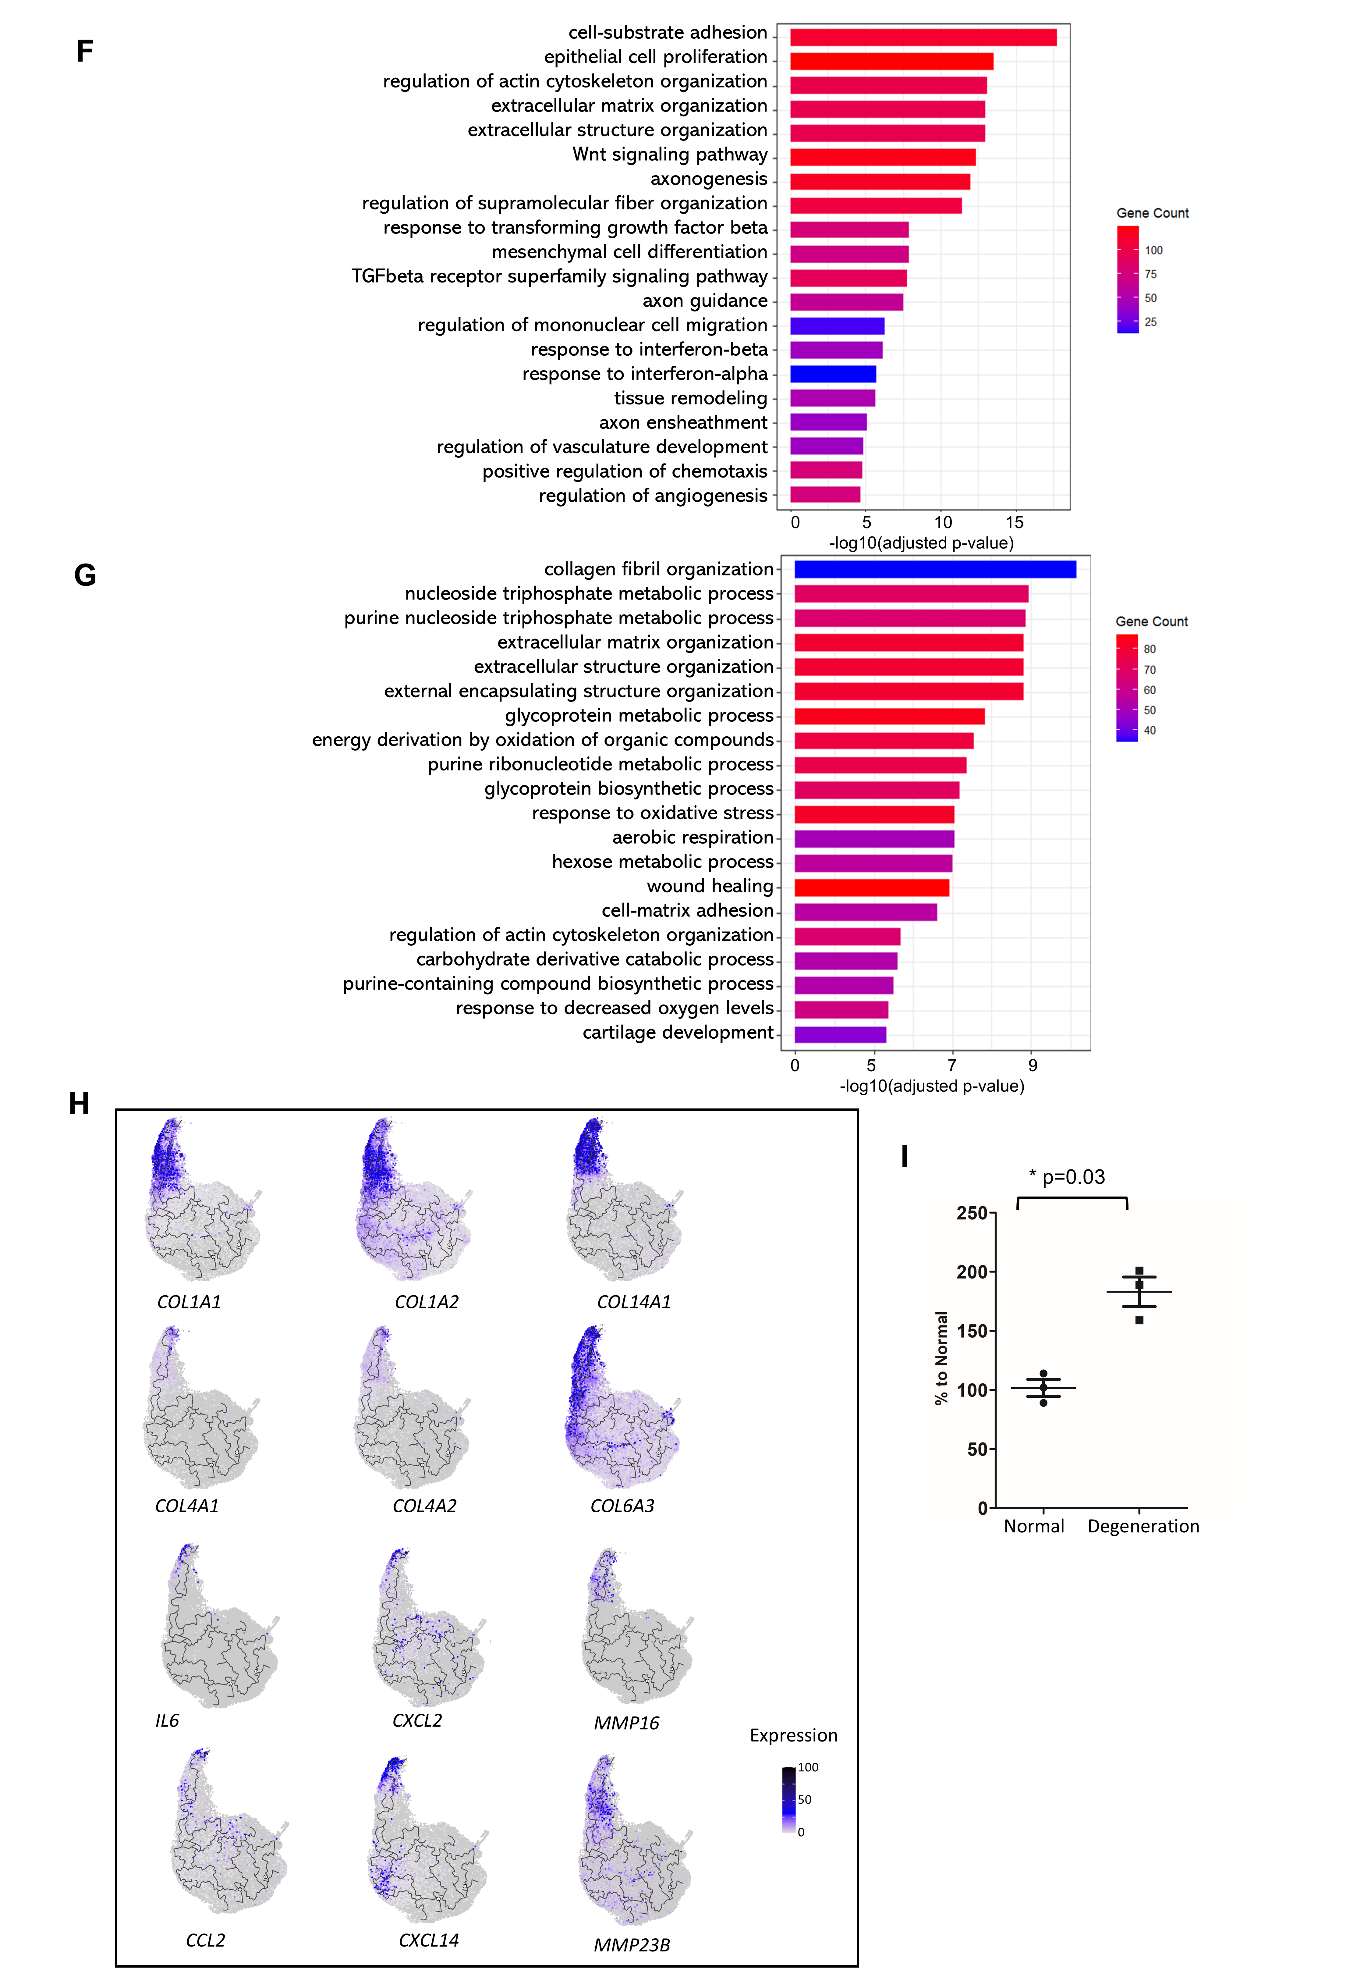
**

**Supplementary Figure 2. DP induced disc degeneration. (Related to Figure 2).**(A) Illustration showing the angle of puncture entry in a posterolateral surgical approach.

(C) Images of the custom-made tools used in vertebrate endplate damage.
(C) Representative histological specimens obtained from L5/6 intervertebral discs of mice from uninjured and DP groups (14 days post-injury) at the same age. Safranin-O/Fast Green-stained sections. Scale bar = 150 µm. Magnified images: scale bar = 60 µm.


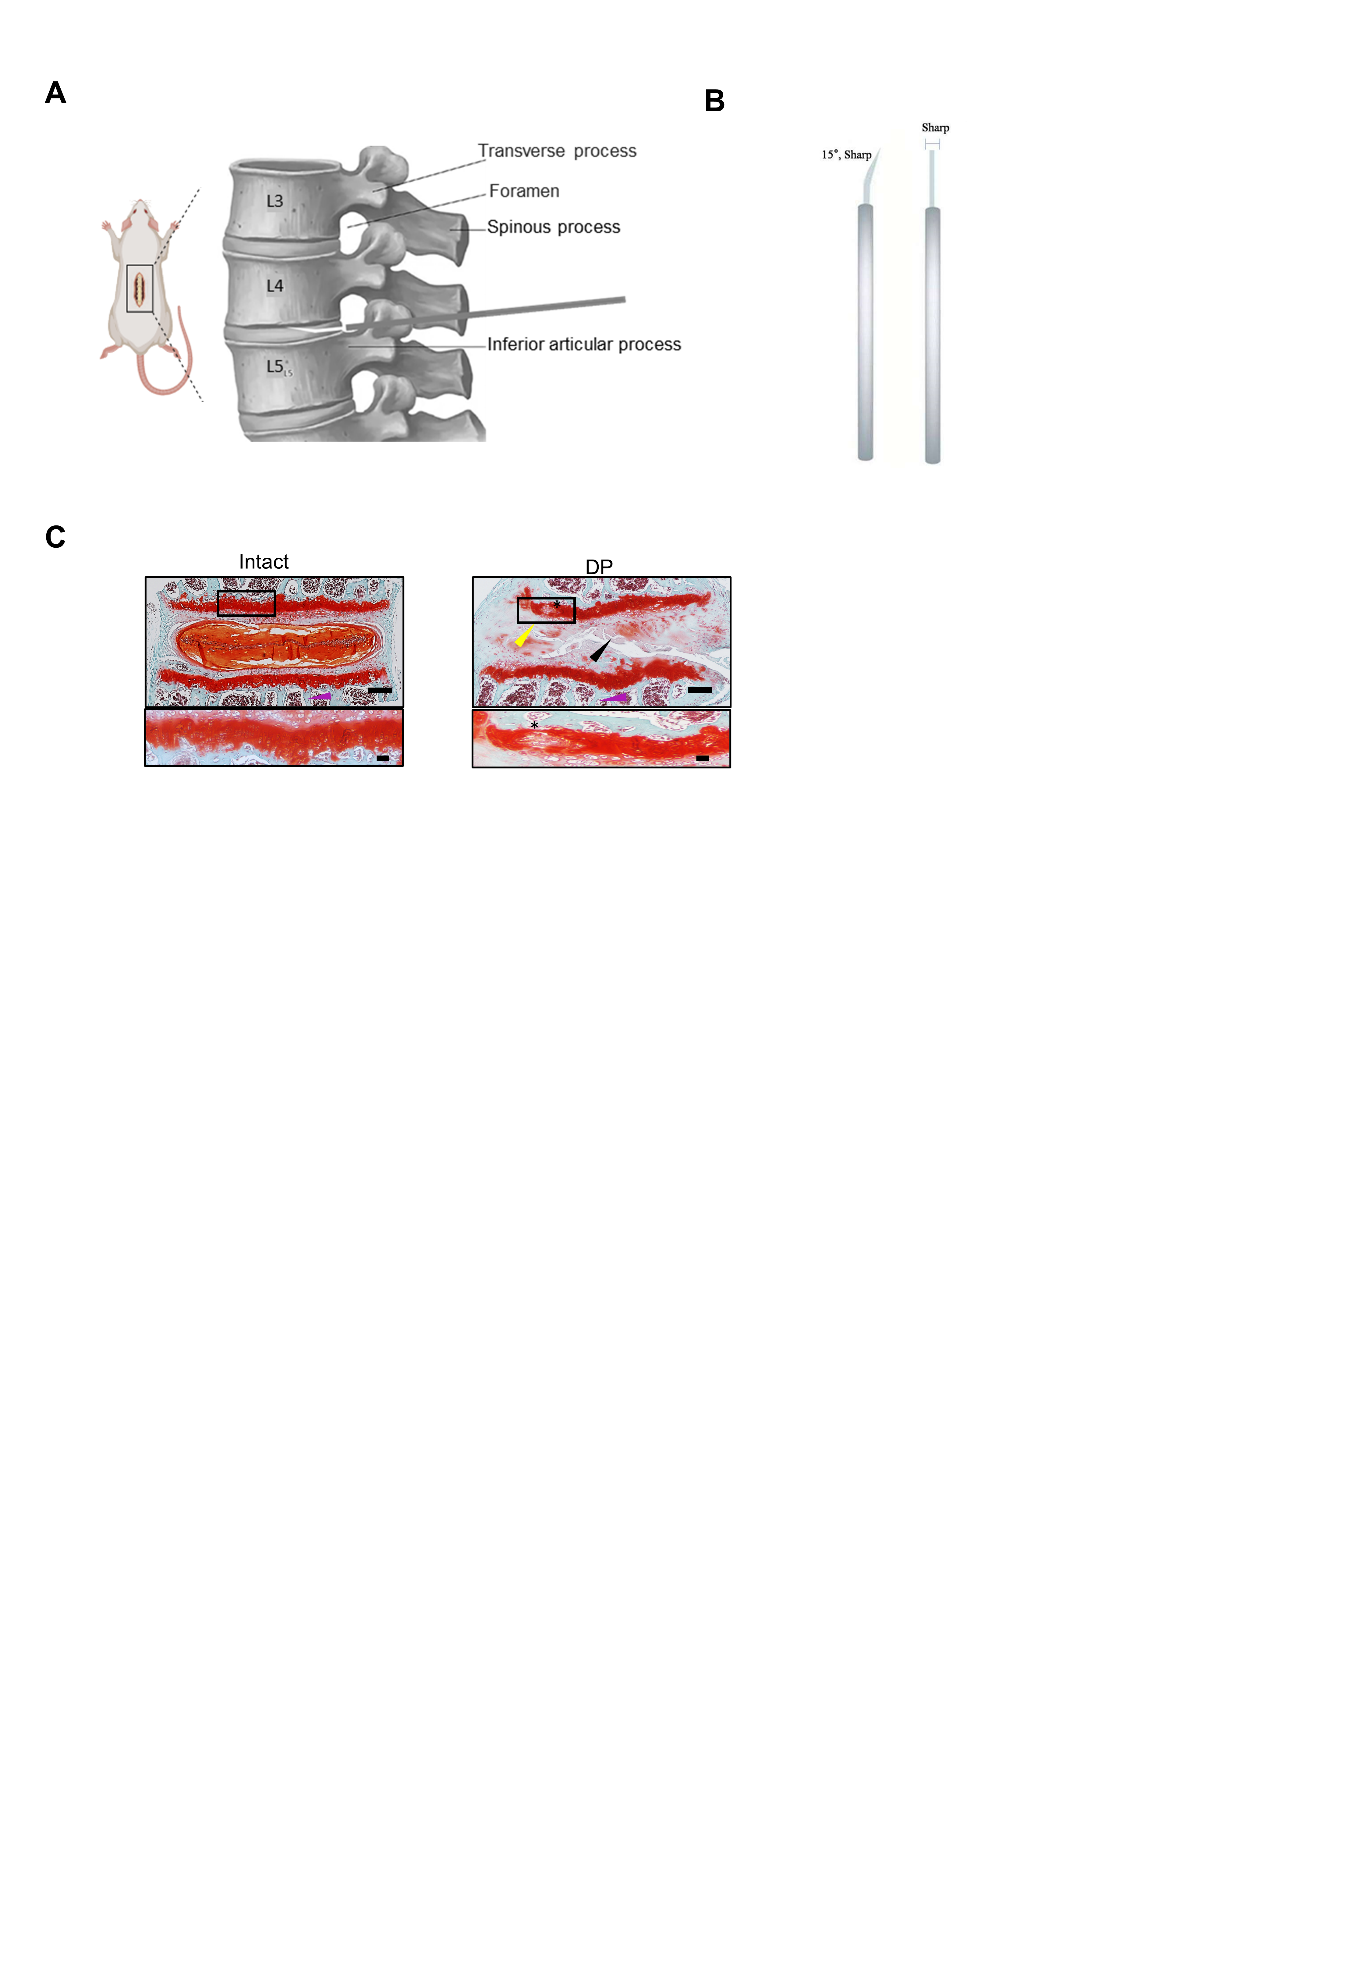

**Supplementary Figure 3. Disc injury induced behavioral changes. (Related to Figure 2).**(A) Plots showing thermal hyperalgesia post analysis by the plantar test at indicated times after DP. Data are presented as mean ± SEM. *p < 0.005. ANOVA. n = 10 per group.
(B) Plot showing burrowing behavior test analyzed at indicated times after DP. Data are presented as mean ± SEM. *p < 0.05. ANOVA. n = 10 per group.
(C) Plot showing the speed tolerance during treadmill walking pre- and post-DP. No statistical significance. n = 8 per group.
(D) Plot showing the rota-rod test pre- and post-DP. No statistical significance. n = 7 per group.
(E–G) Plot showing the open field test. Total travelled distance, movement velocity, and percentage of time spent in central/peripheral regions were recorded and quantified 28 days post-DP. No statistical significance. n = 7 per group.


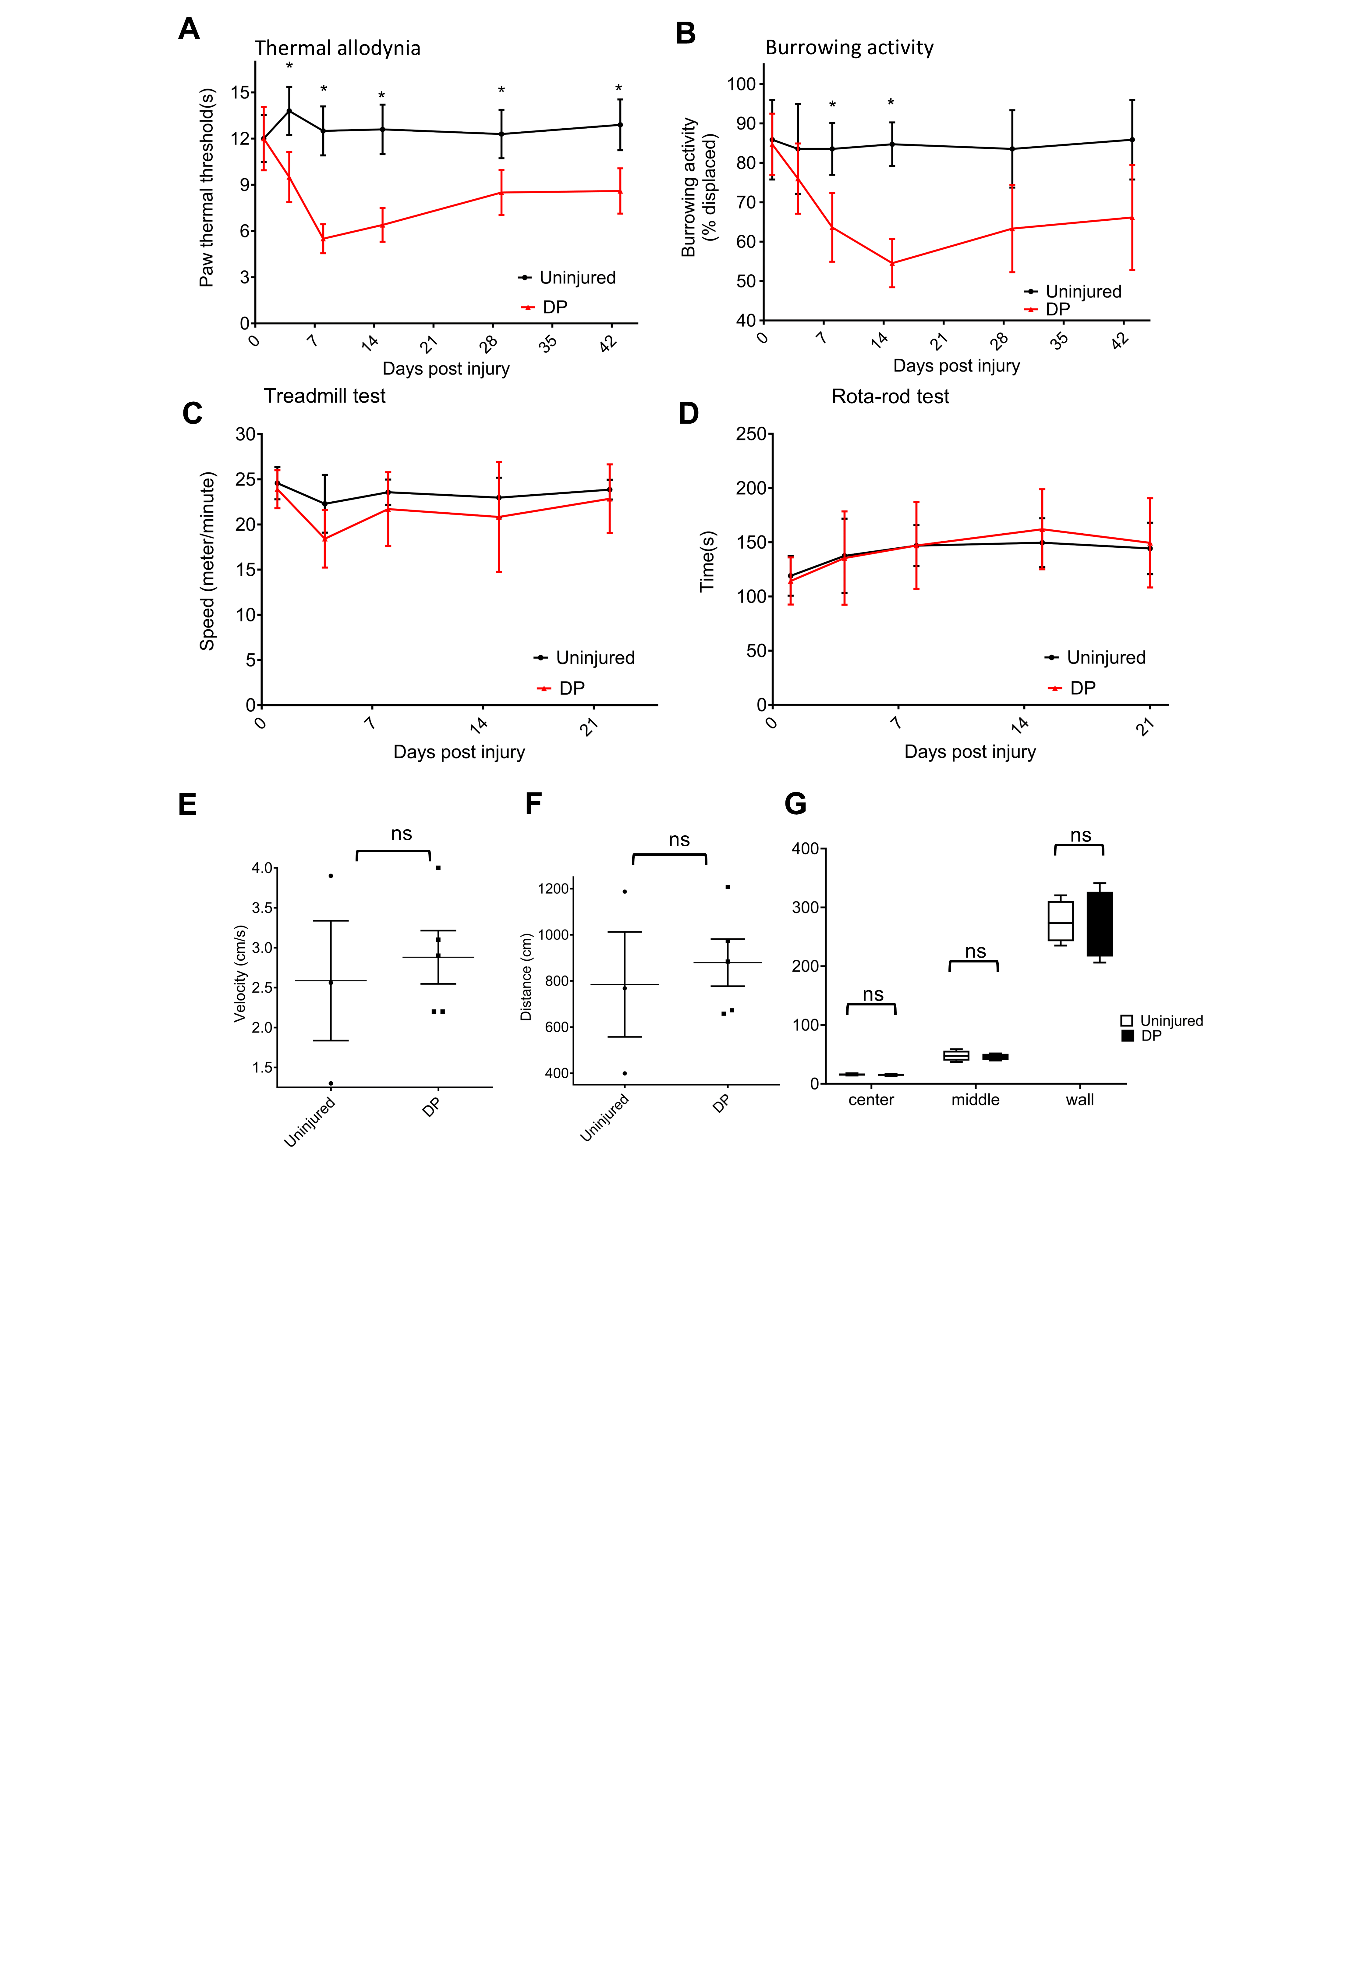


**Supplemental Figure 4 *Csf1r* deletion reduces proinflammatory cytokine release post-disc injury (Related to Figure 3).**

(A) Immunofluorescence of Iba1 and CSF1R in microglia from tamoxifen treated *Cx3cr1CreER/+: Csf1rfl/fl* mouse. Scale bar: 50 µm.

(B) Antibody chart for cytokine array.
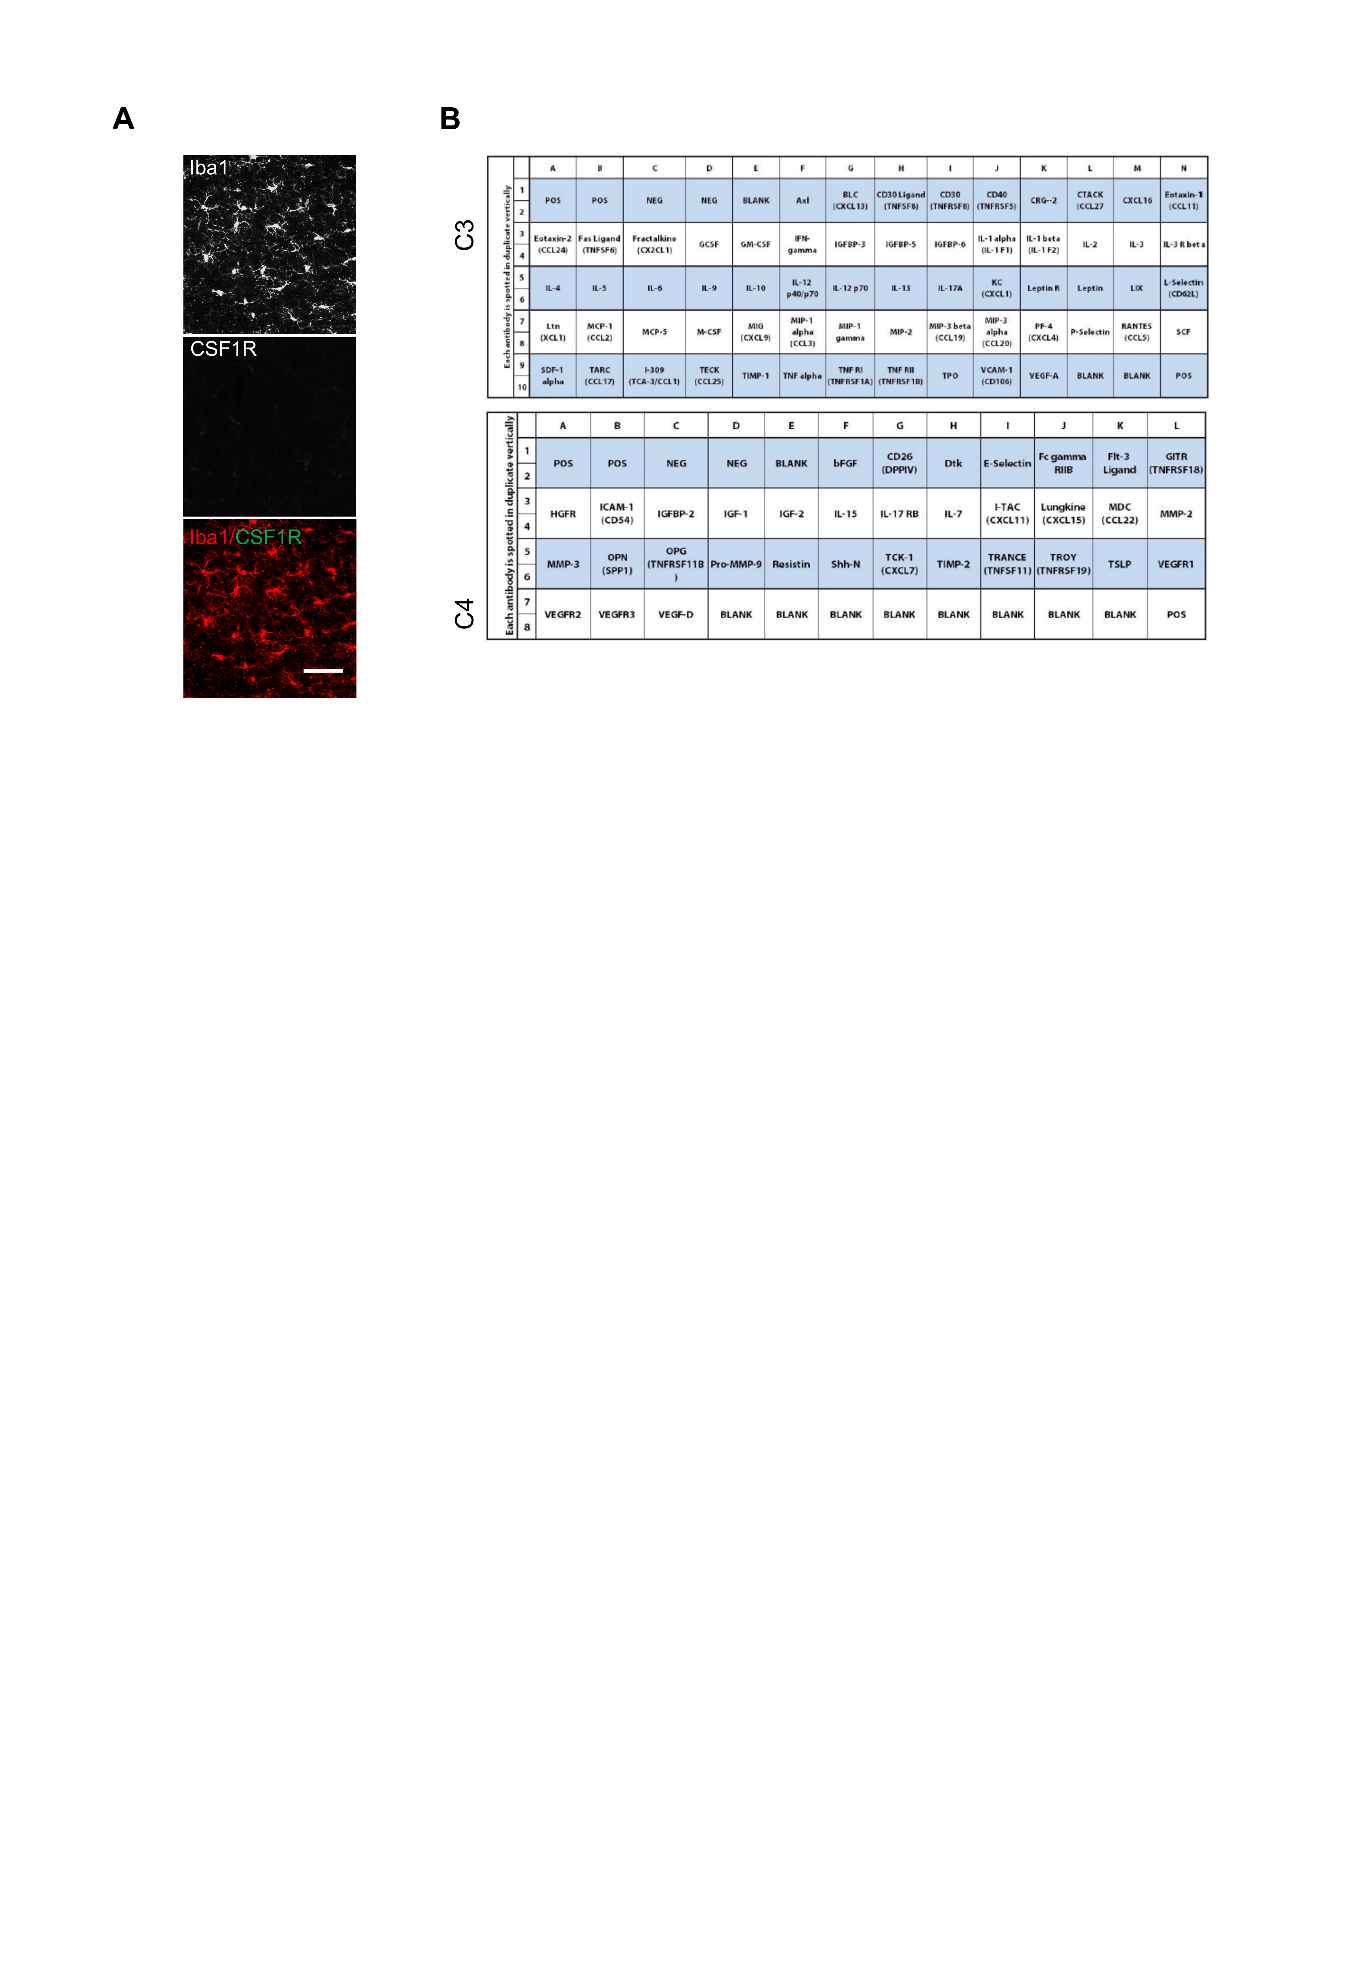


**Supplemental Figure 5. Disc injury activates DRG macrophages. (Related to Figure 4).**(A) Photomicrographs showing Iba1 immunostaining and quantification in DRG from DP mice at different time points (days post injury(DPI). Scale bar: 100 µm. Data are mean ± SEM. *p < 0.05. n = 5–6 DRGs. ANOVA.
(B)  Ki67 quantification in *Cx3cr1GFP+/−* mice DRG. Scale bar: 50 µm. Data are mean ± SEM. *p < 0.05. n = 6. ANOVA.
(C) Iba1 quantification 7- and 14- DPI in DRG from *Cx3cr1CreER/+: Csf1rfl/fl* mice. Veh*(Csf1r* WT), TAM*(Csf1r* KO) . Data are mean ± SEM. *p < 0.05. n = 5 DRGs. ANOVA.
(D) Photomicrographs and plot showing CSF1 and Nissl staining in DRG from *Cx3cr1CreER/+: Csf1rfl/fl* mice. Veh*(Csf1r* WT), TAM*(Csf1r* KO). Scale bar: 50 µm. CSF1/Nissl ratio quantified (lower panel). n = 6–7 DRGs per group. *p < 0.05. ANOVA.
(E) Photomicrographs and plot showing Iba1 and CSF1R immunostaining (14 DPI) in spinal cord dorsal horn of wild type mice and quantification of different timepoints. Scale bar: 50 µm.

Data are mean ± SEM. *p < 0.05. n = 5 DRGs. ANOVA.


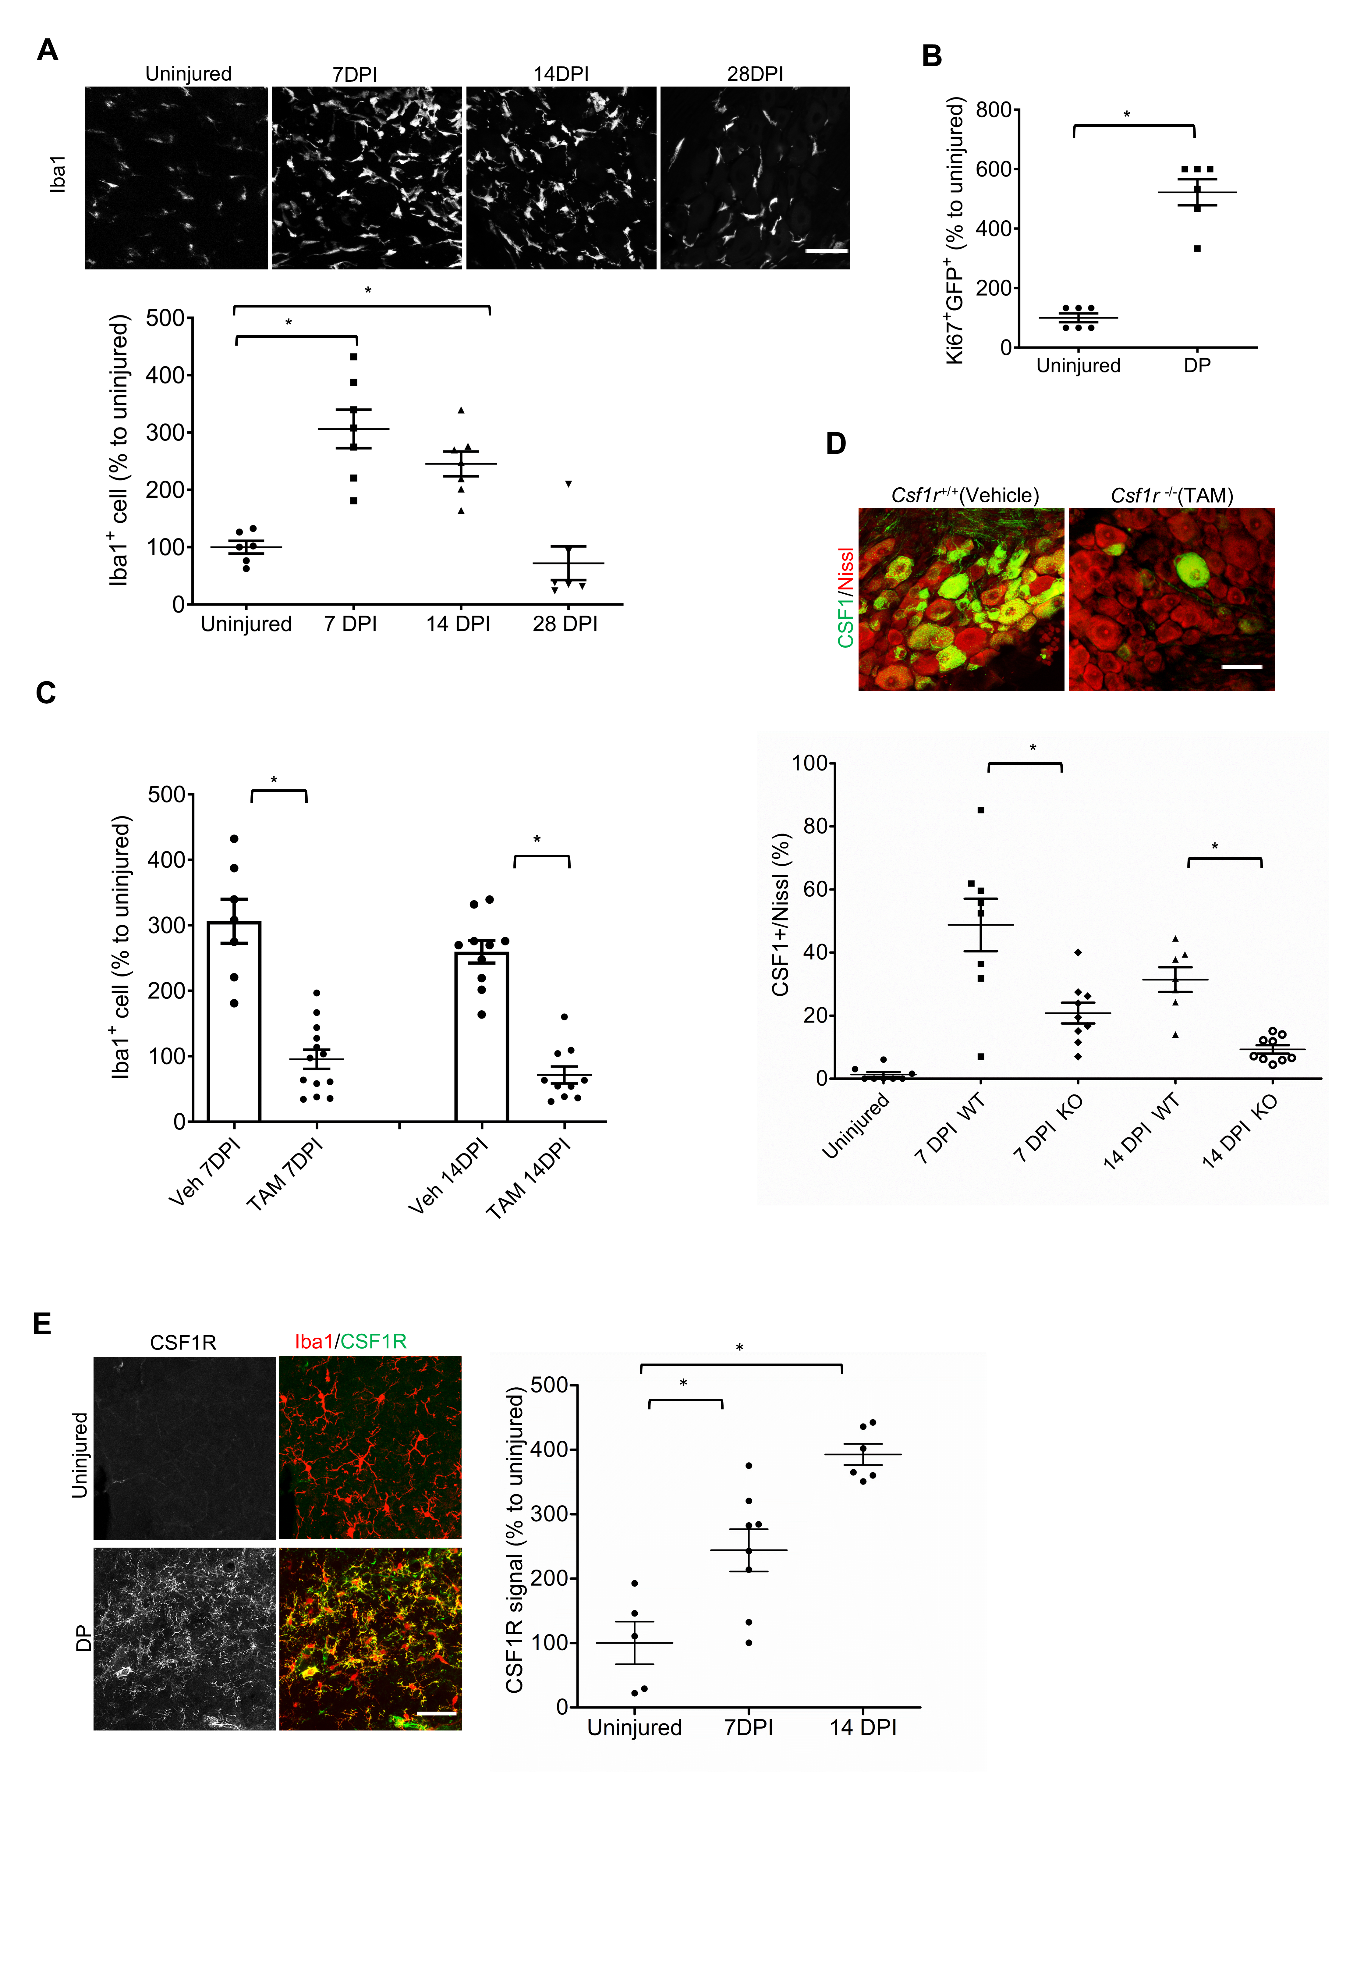


**Supplemental Figure 6 GW2580 reduces macrophage infiltration in IVD and DRG Post-DP (Related to Figure 5).**(A-B) Photomicrographs of GFP staining in IVDs of Cx3cr1GFP+/- mice from inner annulus fibrosus and NP(A) and quantification of GFP+ cells(B). 90 days after DP. Scale bar: 50 µm. p* < 0.05; ANOVA.  n = 6 each group.

(C) Iba1 quantification in DRG in wild type mice. Data are mean ± SEM. *p < 0.05. ANOVA. n = 5-6 DRGs.
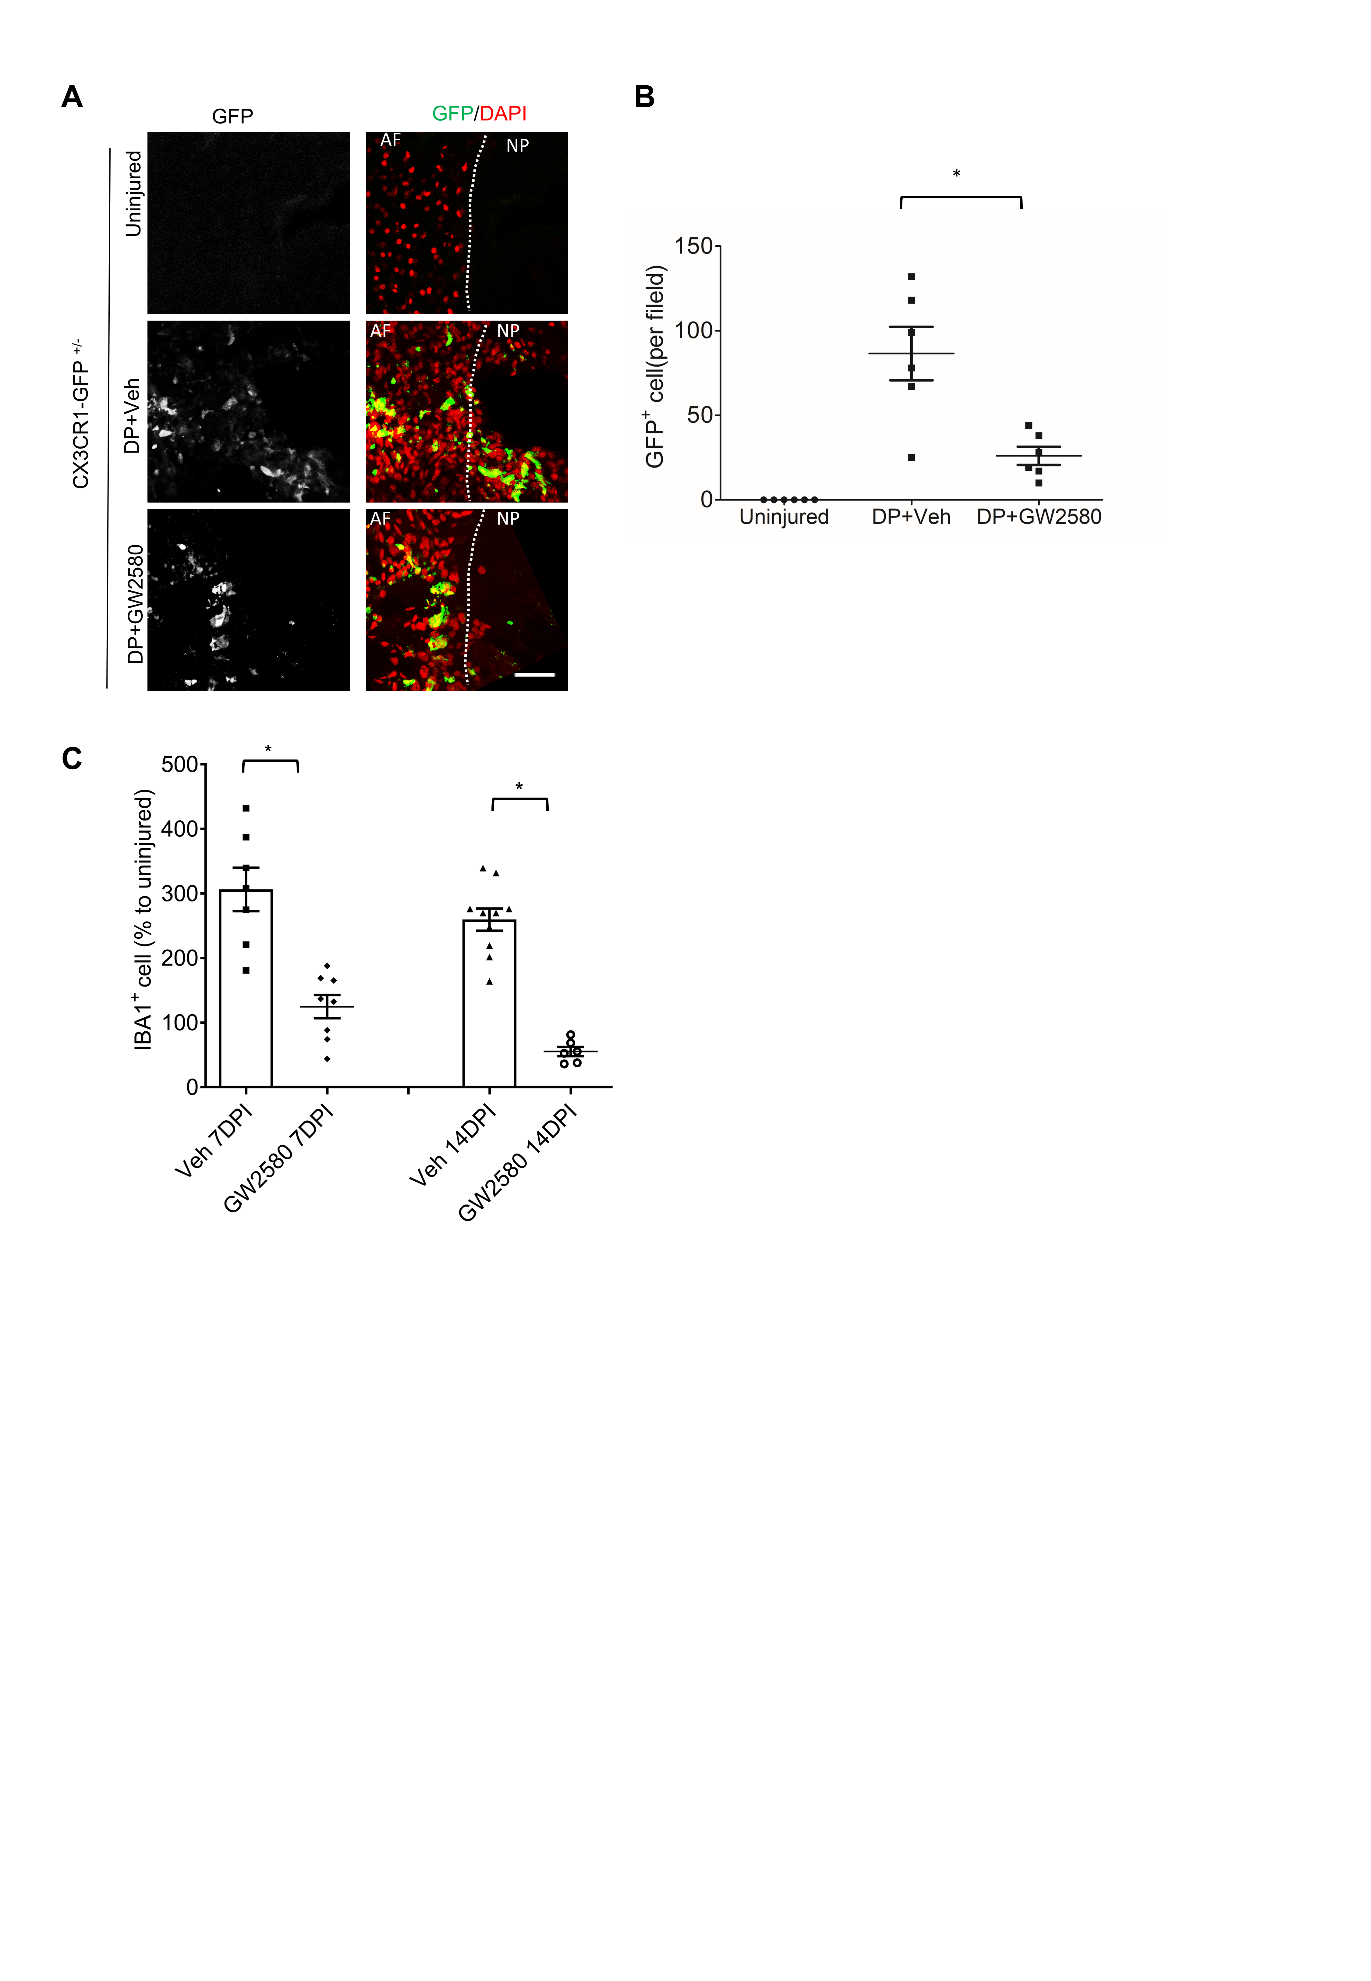


**Supplemental Figure 7. GW2580 alleviates behavior changes after DP. Related to Figure 6.**
(A) Photomicrographs of CSF1R immunostaining in spinal cord. Scale bar: 200 µm. 50 µm(magnification).

(B) Fluorescence imaging showing Fos (tdTomato) expression in DRG of L5. Scale bars: 400 µm (main), 10 µm (insets). Quantification (right panel). *p < 0.05. ANOVA. n = 5-8 per group.

(C) Plot showing burrowing behavior post-DP. Data are mean ± SEM. *p < 0.05. ANOVA. n = 8 per group.
(D) Plot showing cold allodynia (plantar test). Data are mean ± SEM. *p < 0.05. ANOVA. n = 10 per group.
(E) Plot showing body weight changes in mice treated with GW2580 or vehicle . Data are mean ± SEM. No statistical significance. n = 10–12 per group.
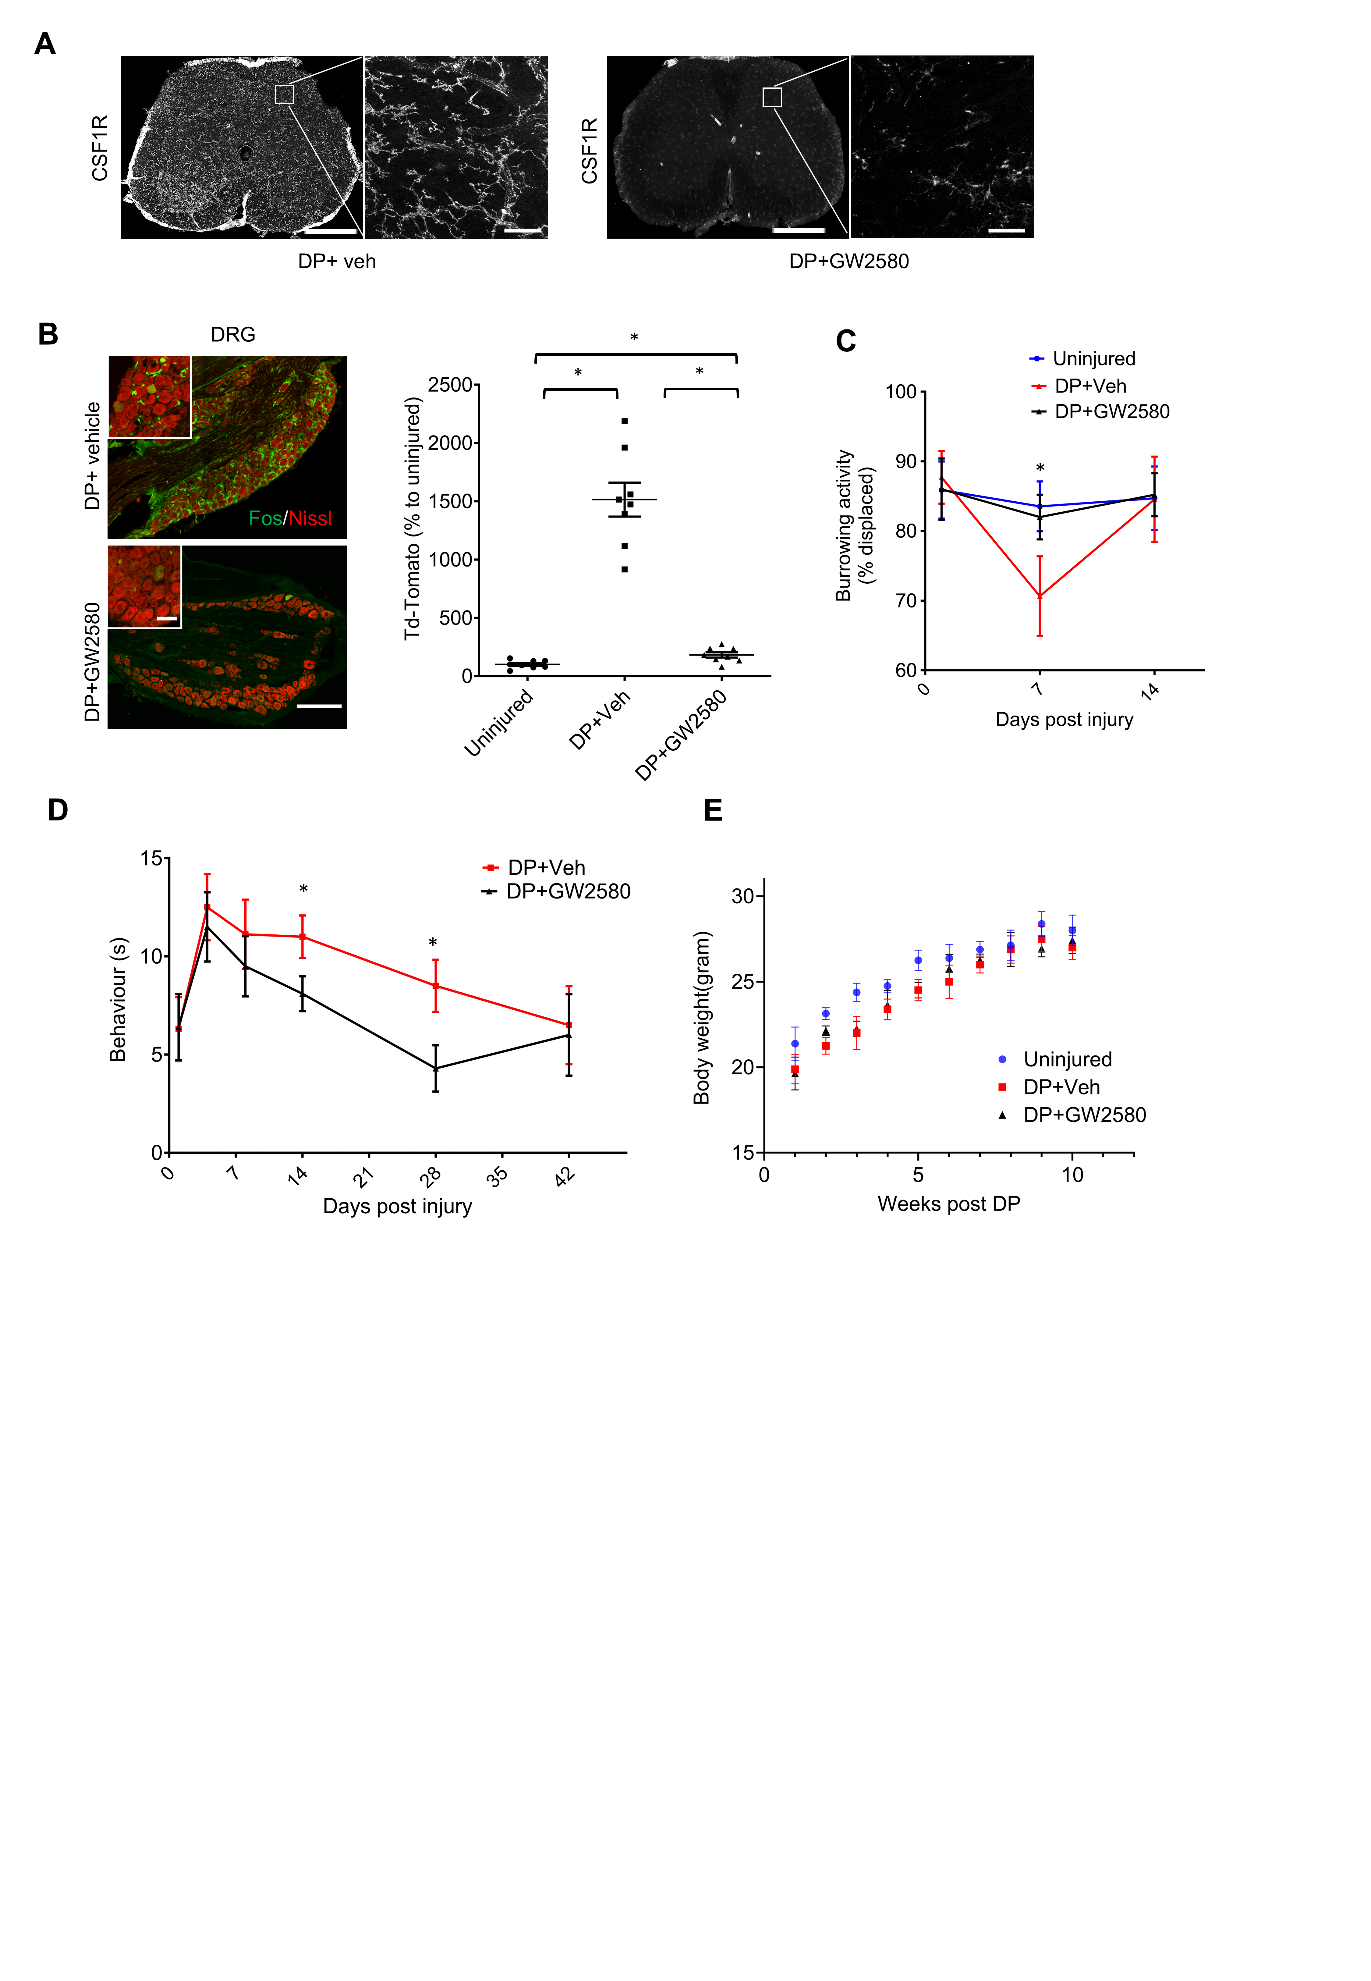

Supplement: Supplementary file 1 [file 4369523463452283126bafb3.docx]
